# Supplementary material for: Whole-Genome Profiles of Malay Colorectal Cancer Patients with Intact MMR Proteins
Source: MDPI journal article supplement (doi:10.3390/genes12091448), 2021-09-20
Supplement: s1 [file s1]

Supplementary Table S1: Alignment statistics of the whole genome probands.

| Samples                         | F1                    | F2                     | F5                     | F8                     | F12                    | F18                    | F19                    |
|---------------------------------|-----------------------|------------------------|------------------------|------------------------|------------------------|------------------------|------------------------|
| Raw reads                       | 1.21x10 <sup>9</sup>  | 1.23x10 <sup>9</sup>   | 1.15x10 <sup>9</sup>   | 1.08x10 <sup>9</sup>   | 1.25x10 <sup>9</sup>   | 1.26x10 <sup>9</sup>   | 1.15x10 <sup>9</sup>   |
| Clean reads                     | 1.20x10 <sup>9</sup>  | 1.22x10 <sup>9</sup>   | 1.14x10 <sup>9</sup>   | 1.00x10 <sup>9</sup>   | 1.24x10 <sup>9</sup>   | 1.25x10 <sup>9</sup>   | 1.14x10 <sup>9</sup>   |
| Clean bases (bp)                | 1.88x10 <sup>11</sup> | 1.83x10 <sup>11</sup>  | 1.71x10 <sup>11</sup>  | 1.51x10 <sup>11</sup>  | 1.86x10 <sup>11</sup>  | 1.87x10 <sup>11</sup>  | 1.71x10 <sup>11</sup>  |
| Mapped reads                    | 1.14x10 <sup>9</sup>  | 1.16x10 <sup>9</sup>   | 1.09x10 <sup>9</sup>   | 9.42x10 <sup>8</sup>   | 1.17x10 <sup>9</sup>   | 1.18x10 <sup>9</sup>   | 1.08x10 <sup>9</sup>   |
| Mapped bases (bp)               | 1.71x10 <sup>11</sup> | 1.74x10 <sup>11</sup>  | 1.63x10 <sup>11</sup>  | 1.41x10 <sup>11</sup>  | 1.76x10 <sup>11</sup>  | 1.77x10 <sup>11</sup>  | 1.62x10 <sup>11</sup>  |
| Mapping rate (%)                | 94.91                 | 95.02                  | 95.15                  | 93.89                  | 94.52                  | 94.59                  | 94.83                  |
| Unique reads                    | 1.11 x10 <sup>9</sup> | 1.13 x10 <sup>9</sup>  | 1.06 x10 <sup>9</sup>  | 9.20 x10 <sup>8</sup>  | 1.15 x10 <sup>9</sup>  | 1.15 x10 <sup>9</sup>  | 1.05 x10 <sup>9</sup>  |
| Unique bases (bp)               | 1.67x10 <sup>11</sup> | 1.70 x10 <sup>11</sup> | 1.59 x10 <sup>11</sup> | 1.38 x10 <sup>11</sup> | 1.72 x10 <sup>11</sup> | 1.73 x10 <sup>11</sup> | 1.58 x10 <sup>11</sup> |
| Unique rate (%)                 | 97.63                 | 97.63                  | 97.65                  | 97.61                  | 97.58                  | 97.57                  | 97.50                  |
| Average sequencing depth (fold) | 52.39                 | 52.78                  | 49.72                  | 43.84                  | 53.41                  | 53.32                  | 49.31                  |
| Coverage (%)                    | 99.81                 | 99.10                  | 99.09                  | 99.36                  | 99.56                  | 99.09                  | 99.19                  |
