# Supplementary material for: Whole-Genome Profiles of Malay Colorectal Cancer Patients with Intact MMR Proteins
Source: MDPI journal article supplement (doi:10.3390/genes12091448), 2021-09-20
Supplement: s1 [file s1]

Supplementary Table S2: Summary of SNVs in seven whole genome samples from CRC patients.

| Samples                 | F1      | F2      | F5      | F8      | F12     | F18     | F19     |
|-------------------------|---------|---------|---------|---------|---------|---------|---------|
| Genome                  | hg19    |
| Total                   | 3255512 | 3294111 | 3278396 | 3231785 | 3303831 | 3277862 | 3295827 |
| 1000genome and dbsnp141 | 3129832 | 3167302 | 3150526 | 3109874 | 3176391 | 3147136 | 3168400 |
| 1000genome specific     | 36019   | 36841   | 35779   | 33908   | 36104   | 39029   | 36055   |
| dbSNP141 specific       | 49254   | 48773   | 49358   | 46943   | 48180   | 49567   | 49469   |
| dbSNP rate              | 97.65%  | 97.63%  | 97.61%  | 97.68%  | 97.60%  | 97.52%  | 97.63%  |
| Novel                   | 40407   | 41195   | 42733   | 41060   | 43156   | 42130   | 41903   |
| Hom                     | 1368161 | 1335716 | 1365694 | 1348279 | 1197106 | 1334555 | 1331790 |
| Het                     | 1887351 | 1958395 | 1912702 | 1883506 | 2106725 | 1943307 | 1964037 |
| Synonymous              | 10717   | 10610   | 10480   | 10503   | 10780   | 10585   | 10545   |
| Missense                | 9601    | 9581    | 9516    | 9449    | 9620    | 9370    | 9500    |
| Stopgain                | 81      | 73      | 82      | 73      | 78      | 73      | 73      |
| Stoploss                | 39      | 33      | 32      | 31      | 29      | 31      | 34      |
| Startgain               | 761     | 720     | 733     | 723     | 736     | 744     | 732     |
| Startloss               | 18      | 17      | 26      | 27      | 25      | 20      | 19      |
| Exonic                  | 22374   | 22209   | 22038   | 22036   | 22487   | 22040   | 22147   |
| Splicing                | 136     | 142     | 146     | 143     | 138     | 138     | 141     |
| NcRNA                   | 5870    | 6134    | 5931    | 5875    | 6177    | 6223    | 6007    |
| UTR5                    | 4175    | 4144    | 4165    | 4118    | 4144    | 4256    | 4175    |
| UTR3                    | 21078   | 21461   | 20977   | 20906   | 21465   | 21162   | 21418   |
| Intronic                | 1284613 | 1288415 | 1289826 | 1273415 | 1302249 | 1286561 | 1293052 |
| Upstream                | 44054   | 44392   | 43965   | 43185   | 44532   | 44161   | 43761   |
| Downstream              | 42679   | 43315   | 43106   | 42308   | 43074   | 43111   | 42724   |
| Intergenic              | 1830533 | 1863899 | 1848242 | 1819799 | 1859565 | 1850210 | 1862402 |
| SIFT                    | 1759    | 1762    | 1798    | 1767    | 1824    | 1711    | 1752    |
| Ti/Tv                   | 2.1322  | 2.1295  | 2.1299  | 2.1275  | 2.131   | 2.13    | 2.1263  |
| dbSNP Ti/Tv             | 2.1343  | 2.1314  | 2.1315  | 2.1289  | 2.1332  | 2.1321  | 2.1285  |
| Novel Ti/Tv             | 1.9249  | 1.9198  | 1.9447  | 1.9552  | 1.9418  | 1.9035  | 1.9449  |
