# Supplementary material for: Whole-Genome Profiles of Malay Colorectal Cancer Patients with Intact MMR Proteins
Source: MDPI journal article supplement (doi:10.3390/genes12091448), 2021-09-20
Supplement: s1 [file s1]

Supplementary Table S3: The most significant pathway enriched by genes harboured the nonsense mutation by Reactome tool in a) F1 b) F2 c) F5 d) F8 e) F12 f) F18 g) F19

|    |                             |          |       |          |          |           |          |
|----|-----------------------------|----------|-------|----------|----------|-----------|----------|
| a) | Pathway name                | Entities |       |          |          | Reactions |          |
|    |                             | found    | ratio | p-value  | FDR*     | found     | ratio    |
|    | Olfactory Signaling Pathway | 12 / 432 | 0.031 | 6.13e-06 | 0.001    | 1 / 2     | 1.72e-04 |
| b) | Pathway name                | Entities |       |          |          | Reactions |          |
|    |                             | found    | ratio | p-value  | FDR*     | found     | ratio    |
|    | Olfactory Signaling Pathway | 12 / 432 | 0.031 | 1.20e-06 | 1.91e-04 | 1 / 2     | 1.72e-04 |
| c) | Pathway name                | Entities |       |          |          | Reactions |          |
|    |                             | found    | ratio | p-value  | FDR*     | found     | ratio    |
|    | Olfactory Signaling Pathway | 10 / 432 | 0.031 | 1.74e-04 | 0.042    | 1 / 2     | 1.72e-04 |
| d) | Pathway name                | Entities |       |          |          | Reactions |          |
|    |                             | found    | ratio | p-value  | FDR*     | found     | ratio    |
|    | Olfactory Signaling Pathway | 9 / 432  | 0.031 | 3.59e-04 | 0.057    | 1 / 2     | 1.72e-04 |
| e) | Pathway name                | Entities |       |          |          | Reactions |          |
|    |                             | found    | ratio | p-value  | FDR*     | found     | ratio    |
|    | Olfactory Signaling Pathway | 11 / 432 | 0.031 | 2.68e-05 | 0.006    | 1 / 2     | 1.72e-04 |
| f) | Pathway name                | Entities |       |          |          | Reactions |          |
|    |                             | found    | ratio | p-value  | FDR*     | found     | ratio    |
|    | Olfactory Signaling Pathway | 10 / 432 | 0.031 | 6.98e-05 | 0.011    | 1 / 2     | 1.72e-04 |
| g) | Pathway name                | Entities |       |          |          | Reactions |          |
|    |                             | found    | ratio | p-value  | FDR*     | found     | ratio    |
|    | Olfactory Signaling Pathway | 10 / 432 | 0.031 | 7.37e-05 | 0.011    | 1 / 2     | 1.70e-04 |

\*False discovery rate (FDR)≤0.05; p-value<0.05
